# Supplementary material
Source: PubMed Central journal article supplement (PMC2648075)
Supplement: tpc.108.063644_1.pdf [file tpc.108.063644_1.pdf]

Supplemental Data. Wamboldt et al., (2009) Participation of Leaky Ribosome Scanning in Protein Dual Targeting by Alternative Translation Initiation in Higher Plants

**Supplemental Table 1. Primers used in the study**

| Construction   | Primer name                                      | Sequence (5'-3')                                                                                    |
|----------------|--------------------------------------------------|-----------------------------------------------------------------------------------------------------|
| UTR (IVTT)     | At1g50840-UTR-IVTT-F2<br>At1g50840-IVTT-R2       | AGTCCTCGAGGACAAAATTCGCCACCATA<br>AGTCCTCGAGAGCAATTTGACCATTTCTTTCTCTAAG                              |
| ATG (IVTT)     | At1g50840-ATG-IVTT-F2<br>At1g50840-IVTT-R2       | AGTCCTCGAGGATTAAGTTCGCTTATGGCC<br>AGTCCTCGAGAGCAATTTGACCATTTCTTTCTCTAAG                             |
| UTR:ATG-1>TTG  | At1g50840-1stATGmut-F<br>At1g50840-1stATGmut-R   | GGGTAGATTAAGTTCGCTTTTGGCCATGGGGGTTTCTC<br>GAGAAACCCCATGGCCAAAAGCGAACTTAATCTACCC                     |
| UTR:ATG-2>TTG  | At1g50840-2ndATGmut-F<br>At1g50840-2ndATGmut-R   | GATTAAGTTCGCTTATGGCCTTGGGGGTTTCTCTTACTTCC<br>GGAAGTAAGAGAAAACCCCAAGGCCATAAGCGAACTTAATC              |
| UTR-L7M        | L-7Mf1<br>L-7Mr1                                 | CGTCACTTCTCCTTCAAGATGGGTAGATTAAGTTCGC<br>GCGAACTTAATCTACCCATCTTGAAGGAGAAGTGACG                      |
| UTR-L7L        | L-7Lf1<br>L-7Lr1                                 | CGTCACTTCTCCTTCAAGCTCGGTAGATTAAGTTCGC<br>GCGAACTTAATCTACCGAGCTTGAAGGAGAAGTGACG                      |
| UTR-M1LM3L     | M1LM3Lf1<br>M1LM3Lr1                             | GATTAAGTTCGCTTTTGGCCTTGGGGGTTTCTC<br>GAAACCCCAAGGCCAAAAGCGAACTTAATC                                 |
| AAG>ACG        | At1g50840-AAG-ACG-F<br>AT1G50840-AAG-ACG-R       | CTGTCGTCACCTTCTCCTTCCAGCTGGGTAGATTAAGTTCGC<br>GCGAACTTAATCTACCCAGCGTGAAGGAGAAGTGACGACAG             |
| AAG>CAG        | At1g50840-AAG-CAG-F<br>AT1G50840-AAG-CAG-R       | CTCTGTGTCACCTTCTCCTTCCAGCTGGGTAGATTAAGTTCGC<br>GCGAACTTAATCTACCCAGCTGGAAGGAGAAGTGACGACAGAG          |
| AAG>TTC        | AT1G50840-AAG-TTC-F<br>AT1G50840-AAG-TTC-R       | CTGTCGTCACCTTCTCCTTCTTCTGGGTAGATTAAGTTCGC<br>GCGAACTTAATCTACCCAGGAAGAAGGAGAAGTGACGACAG              |
| AAG deleted    | At1g50840-CTT-AAGdel-F<br>AT1G50840-CTT-AAGDEL-R | GACACAGACGTCACATCACCATCCTGGGTAGATTAAGTTCGCTTATG<br>CATAAGCGAACTTAATCTACCCAGGATGGTGATGTGACGCTCTGTGTC |
| AAGdel + stop  | At1g50840-AAGstop-F<br>AT1G50840-AAGSTOP-R       | CCGACTCTGTCGTCACCTTCTAATTCCTGGGTAGATTAAGTTC<br>GAACTTAATCTACCCAGGAATTAGAAGTGACGACAGAGTCCG           |
| ATA>AGG        | At1g50840-ATA-AGG-F<br>AT1G50840-ATA-AGG-R       | GAGGACAAAATTCGCCACCAGGAACCCATTTTTTAATCTCCG<br>CGGAGATTAATAATAGGGTTCTGTTGGCGAATTTGTCTCT              |
| DEL*           | At1g50840-CTmut-F1<br>At1g50840-CTmut-R1         | TTAATCTCCGACTCTGTCGTCAAAGCTGGGTAGATTAAGTTCGC<br>GCGAACTTAATCTACCCAGCTTTGACGACAGAGTCCGAGATTA         |
| MUT*           | At1g50840-CTT2-F<br>At1g50840-CTT2-R             | CCCTATTTTTAATCTCCGACACAGACGTCACATCACCATCAAGCTG<br>CAGCTTGATGGTGATGTGACGCTGTGTGCGGAGATTAATAATAGGG    |
| At2g15790 WT   | At2g15790-UTR-IVTT-WT<br>At2g15790-IVTT-Rev      | AGCTCTCGAGAGGAAGAAGAAGAAGAAGAAGATG<br>TGACCTCGAGGTTGGGACCAGAGTTAGCCATAGAGAGCAT                      |
| At2g15790 CTG  | At2g15790-CTG-IVTT-For<br>At2g15790-IVTT-Rev     | AGCTCTCGAGAGACTGAGGAAGAAGAAGAAGAAGAAGATG<br>TGACCTCGAGGTTGGGACCAGAGTTAGCCATAGAGAGCAT                |
| At2g15790 CTG1 | At2g15790-CTG-IVTT-For<br>At2g15790-IVTT-Rev     | AGCTCTCGAGAGACTGAGGAAGAAGAAGAAGAAGAAGATG<br>TGACCTCGAGGTTGGGACCAGAGTTAGCCATAGAGAGCAT                |
| At2g15790 CTG2 | At2g15790-CTG-F2<br>At2g15790-IVTT-Rev           | AGTCCTCGAGTTCAAGCTGGGTAGAAAGAAGAAGAAGAAGATG<br>TGACCTCGAGGTTGGGACCAGAGTTAGCCATAGAGAGCAT             |
| At2g15790 CTG3 | At2g15790-CTG-F3<br>At2g15790-IVTT-Rev           | AGTCCTCGAGAAGCTGGGTAGATTAAGAAGAAGAAGAAGATGGG<br>TGACCTCGAGGTTGGGACCAGAGTTAGCCATAGAGAGCAT            |
| At2g15790 ATG  | At2g15790-ATG-IVTT-For<br>At2g15790-IVTT-Rev     | AGCTCTCGAGATGGGTAGGTCAAAGTGTTCATGGACATT<br>TGACCTCGAGGTTGGGACCAGAGTTAGCCATAGAGAGCAT                 |
| At3g05580 UTR  | At3g05580-IVTT-UTR-For                           | TTGCAAGCTTATTCTGGTGAAAAGGTTGGGATCAGAGGA                                                             |

|               |                                              |                                                                                       |
|---------------|----------------------------------------------|---------------------------------------------------------------------------------------|
|               | AT3G05580-IVTT-REV                           | TTGCAAGCTTAGCATCTTCATGGTTTCCTCTCAAGAGAAA                                              |
| At3g05580 ATG | At3g05580-IVTT-ATG-For<br>AT3G05580-IVTT-REV | TTGCAAGCTTATGATGACGAGTATGGAAGGGATGATGGAG<br>TTGCAAGCTTAGCATCTTCATGGTTTCCTCTCAAGAGAAA  |
| At4g15850 UTR | At4g15850-IVTT-UTR-For<br>At4g15850-IVTT-Rev | TTGCCTCGAGAAGCTGGTGGTATGGGGAGAGATAAAGAAG<br>TTGCCTCGAGACCCACAGCTGAGCCAACAGATAATCCTAC  |
| At4g15850 ATG | At4g15850-IVTT-ATG-For<br>At4g15850-IVTT-Rev | TTGCCTCGAGATGGATTCCGGTTGTTCCATGGATGAGAGCT<br>TTGCCTCGAGACCCACAGCTGAGCCAACAGATAATCCTAC |
| At2g20680 UTR | At2g20680-IVTT-UTR-For<br>At2g20680-IVTT-Rev | TTGCCTCGAGAAACTGGCGAGATTACAAGCGATTGTGAAA<br>TTGCCTCGAGGGCCTCTGCGATTACATGATCTAAGGCCTT  |
| At2g20680 ATG | At2g20680-IVTT-ATG-For<br>At2g20680-IVTT-Rev | TTGCCTCGAGATGGCGGCTCCTACAGGGAACGGGCCAGTG<br>TTGCCTCGAGGGCCTCTGCGATTACATGATCTAAGGCCTT  |
| Poly 1 UTR    | At3g20540-IVTT-UTR-For<br>At3g20540_IVTT_Rev | AGTCCTCGAGATAGAGCAATGGCTACCAGCTCAGCTTTGT<br>AGTCCTCGAGTTTGGGGACAAAGCCTTTTAAAATATAACT  |
| Poly 1 ATG    | At3g20540_IVTT_ATG_For<br>At3g20540_IVTT_Rev | AGTCCTCGAGATGGGGTTTCTCTTCGTCACTTGTCTCCT<br>AGTCCTCGAGTTTGGGGACAAAGCCTTTTAAAATATAACT   |

\* Primers made specifically for Poly 2 in Figure 2.ig 2.
